# Supplementary material for: Homogeneous epoxidation of lipophilic alkenes by aqueous hydrogen peroxide: catalysis of a Keggin-type phosphotungstate-functionalized ionic liquid in amphipathic ionic liquid solution
Source: Royal Society of Chemistry journal article supplement (doi:10.1039/b913059b), 2009-01-01
Supplement: b913059b.pdf [file b913059b.pdf]

## Supplementary information

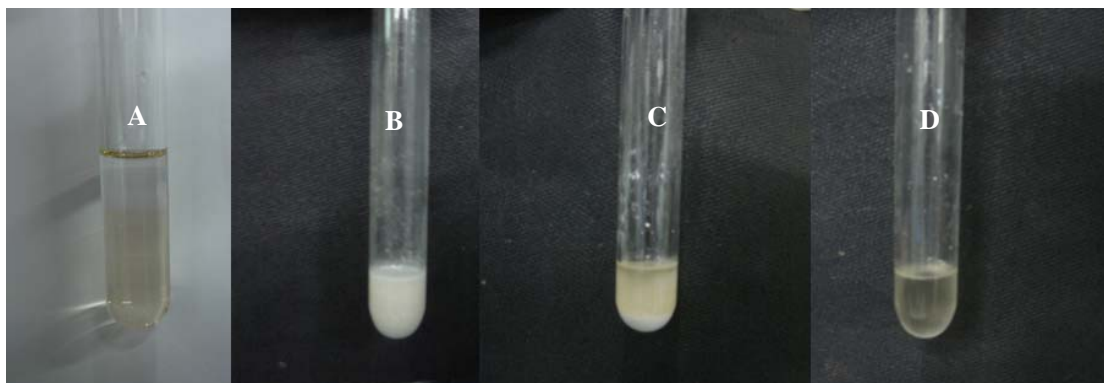

**S. Figure 1** The reaction mixtures obtained at different conditions:

**A:** 1 mL [Bpy]BF<sub>4</sub> mixed with 0.5 mL *cis*-cyclooctene.

**B:** 1.5 mL [Bpy]BF<sub>4</sub> mixed with 1.5 mL [Dopy]BF<sub>4</sub>, 0.5 mL *cis*-cyclooctene, 0.75 mL 30 wt% aqueous H<sub>2</sub>O<sub>2</sub>, and 0.1 mmol catalyst **1** after stirring at room temperature for 30 min.

**C:** 1.5 mL [Bpy]BF<sub>4</sub> mixed with 1.5 mL [Dopy]BF<sub>4</sub>, 0.5 mL *cis*-cyclooctene, 0.75 mL 30 wt% aqueous H<sub>2</sub>O<sub>2</sub>, and 0.1 mmol catalyst **1** after stirring at room temperature for 30 min and then standby.

**D:** the mixture of 1.5 mL [Bpy]BF<sub>4</sub>, 1.5 mL [Dopy]BF<sub>4</sub>, 0.5 mL *cis*-cyclooctene, 0.75 mL 30 wt% aqueous H<sub>2</sub>O<sub>2</sub>, and 0.1 mmol catalyst **1** after the reaction at 80 °C for 1 h and then cooling to room temperature.
